# Supplementary material
Source: Springer Nature journal article supplement (https://www.springermedizin.de/resource/supplementary/12889_2012_5421_MOESM2_ESM.pdf/9495090)

# Shaanxi

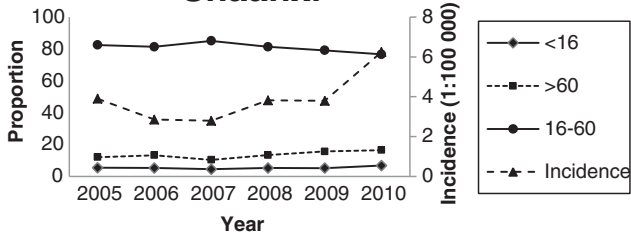

## Hebei

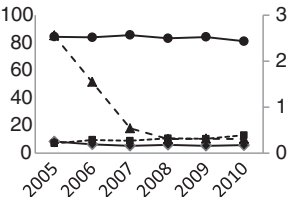

## Heilongjiang

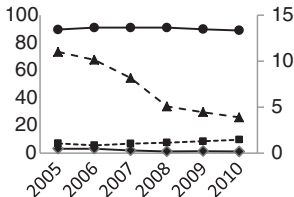

## Jilin

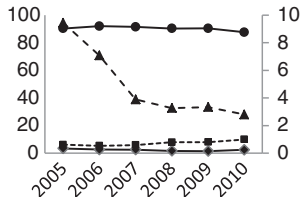

## Liaoning

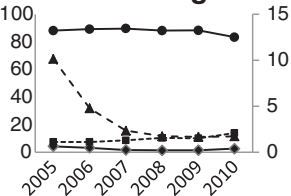

## Shandong

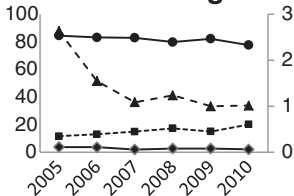

## Zhejiang

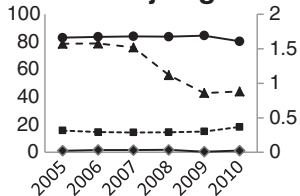

Supplement: MOESM2 [file 9495090]
